# Supplementary material for: La "gaieté française" : théories et représentations du caractère national dans la littérature des Lumières
Source: MDPI journal article supplement (doi:10.3390/pathogens11010066), 2005-01-01
Supplement: s1 [file s1]

## Supplementary data

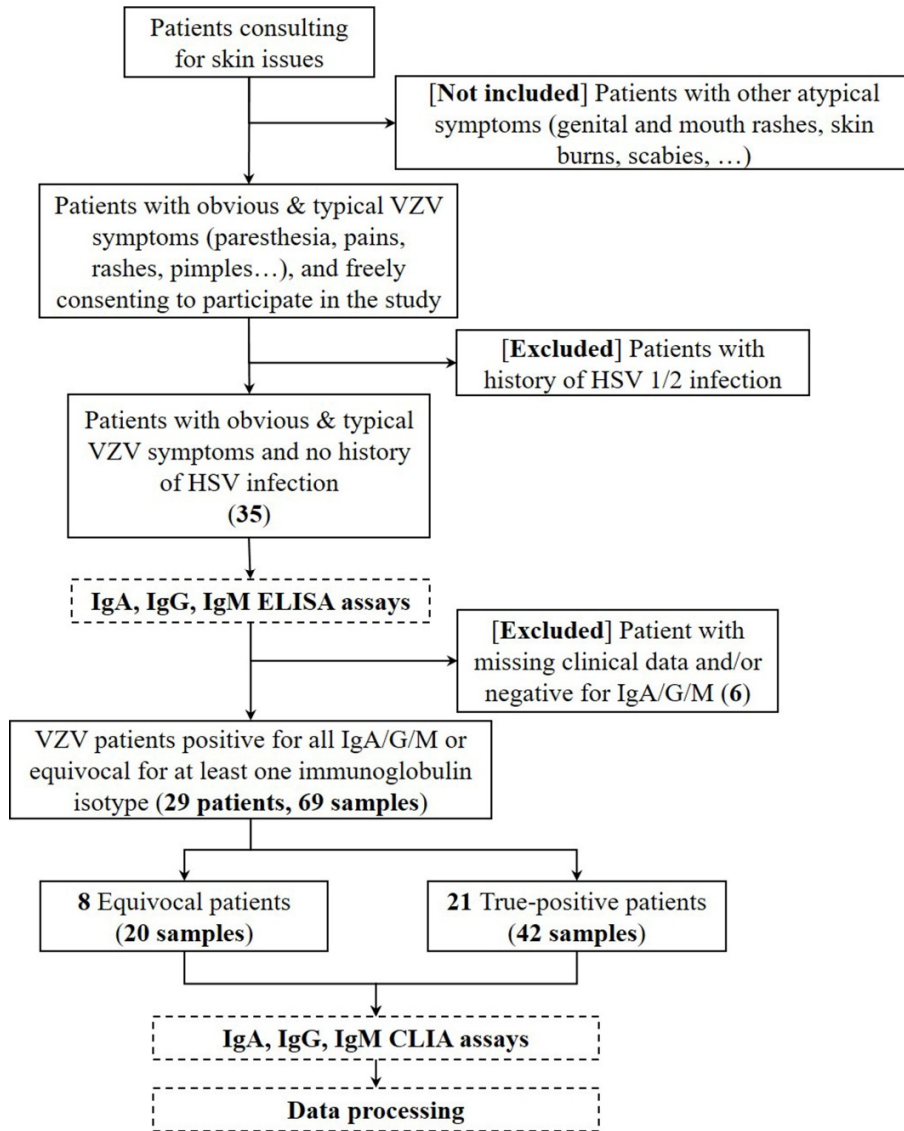

**Supplementary Figure S1: Flow chart of patient inclusion and analyses.** None of the retained VZV-patients had been vaccinated with VZV vaccine.

**Supplementary Table S1: Epidemiological and clinical patient data**

| Nº | Sex | Age | Symp. onset | Symptoms                                                                      | Organ transplant | Other infectious diseases |
|----|-----|-----|-------------|-------------------------------------------------------------------------------|------------------|---------------------------|
| 1  | M   | 72  | 7           | Fever and rashes, and discomfort for more than 7 days                         | no               | —                         |
| 2  | F   | 37  | 4           | 4 days of lesions on upper left abdomen. 1 day of pain                        | no               | no                        |
| 3  | M   | 79  | 6           | Lesions on left upper limb and front chest wall for 6 days with pain          | no               | no                        |
| 4  | M   | 29  | —           |                                                                               | no               | no                        |
| 5  | M   | 38  | 7           | Head and neck pain for 7 days and lesions for 4 days                          | no               | no                        |
| 6  | M   | 33  | 2           | Redness and swelling of right eye with pain for 2 days                        | no               | no                        |
| 7  | F   | 48  | 3           | Headache for 3 days with redness of right eye frame for 1 day                 | no               | no                        |
| 8  | M   | 35  | 5           | Lesions on right lumbodorsal region with pain for 5 days                      | no               | no                        |
| 9  | M   | 31  | 6           | Redness and swelling around left frame for 6 days with aggravation for 2 days | no               | no                        |
| 10 | F   | 63  | 6           | Left parietal temporal rash with pain for 6 days                              | no               | no                        |
| 11 | M   | 69  | 4           | Left head and neck rash for 4 days                                            | no               | no                        |
| 12 | M   | —   | 8           | Left head and neck rash for 8 days                                            | no               | no                        |
| 13 | F   | 20  | 3           | Rash on right eyelid with pain for 3 days                                     | no               | Hepatitis B               |
| 14 | M   | 63  | 3           | Right facial rash with pain for 3 days                                        | no               | no                        |
| 15 | M   | 26  | 2           | Rash on left shoulder with pain for 2 days                                    | no               | no                        |
| 16 | F   | 65  | 15          | Rash on right lower back with pain for 15 days                                | no               | no                        |
| 17 | F   | 27  | 7           | Fever for 1 week. lesions on left chest and back with pain for 5 days         | no               | no                        |
| 18 | M   | 79  | 14          | Rash on right side of head with pain for 2 weeks                              | no               | no                        |
| 19 | M   | 70  | 7           | Rash on left shoulder, back, left upper limb for 1 week and pain for 3 days   | no               | no                        |
| 20 | M   | 73  | 2           | Rash on left side of waist and abdomen for 2 days                             | no               | Hepatitis B               |
| 21 | M   | 38  | 15          | Rash on right side of waist with pains                                        | no               | no                        |
| 22 | M   | 63  | 5           | Chest and back rash with fever for 5 days                                     | no               | no                        |
| 23 | F   | 28  | 5           | Right chest and back rash with pain for 5 days                                | no               | no                        |
| 24 | M   | 48  | 2           | Rash on left side back for 2 days                                             | no               | Hepatitis A, Hepatitis E  |
| 25 | M   | 82  | 9           | Neck rash 9 days                                                              | no               | no                        |
| 26 | F   | 56  | 10          | Left head pain for 10 days. left head and face rash for 8 days                | no               | no                        |
| 27 | F   | 70  | 5           | Pain in left chest and back for 1 week and rash for 5 days                    | no               | no                        |
| 28 | M   | 38  | 15          | Fever and localized rashes                                                    | no               | no                        |
| 29 | F   | 45  | 7           | Rashes on left side of waist, abdomen and back for 5 days, fever for 7 days   | no               | no                        |

The sample from these patients were collecting at the visiting time, for this study. No patient had received VZV vaccine before the consulting time. Moreover, no skin diseases has been reported before by any of the patients.

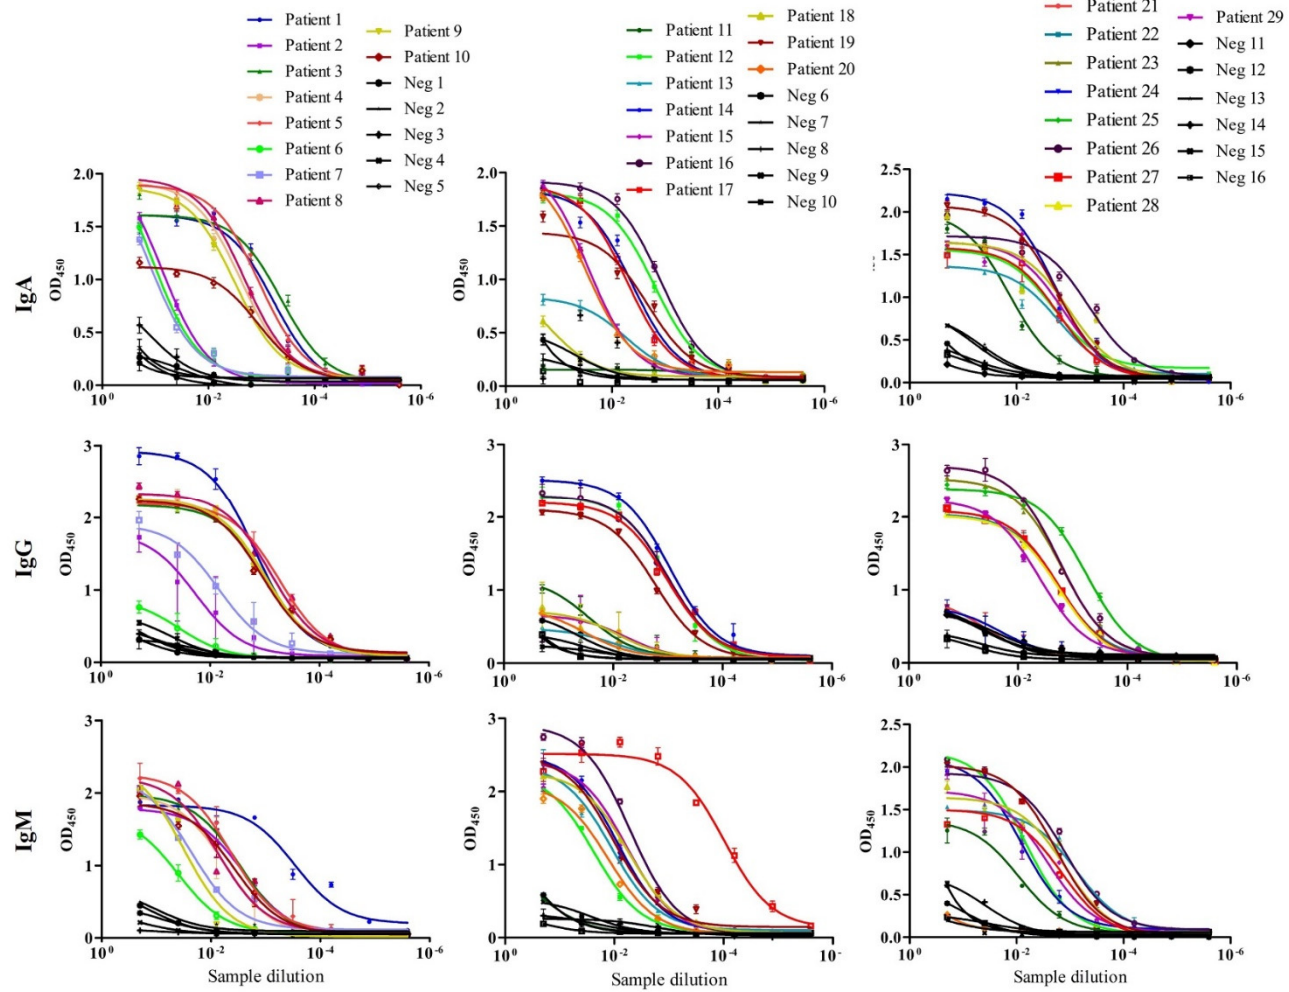

**Supplementary Figure S2.** ELISA results of all the 29 included patients. All the patients sample were performed thrice, with 5-fold serial dilution from for each sample. All the negative controls are shown in black curves, while the patients are shown in colored curves.

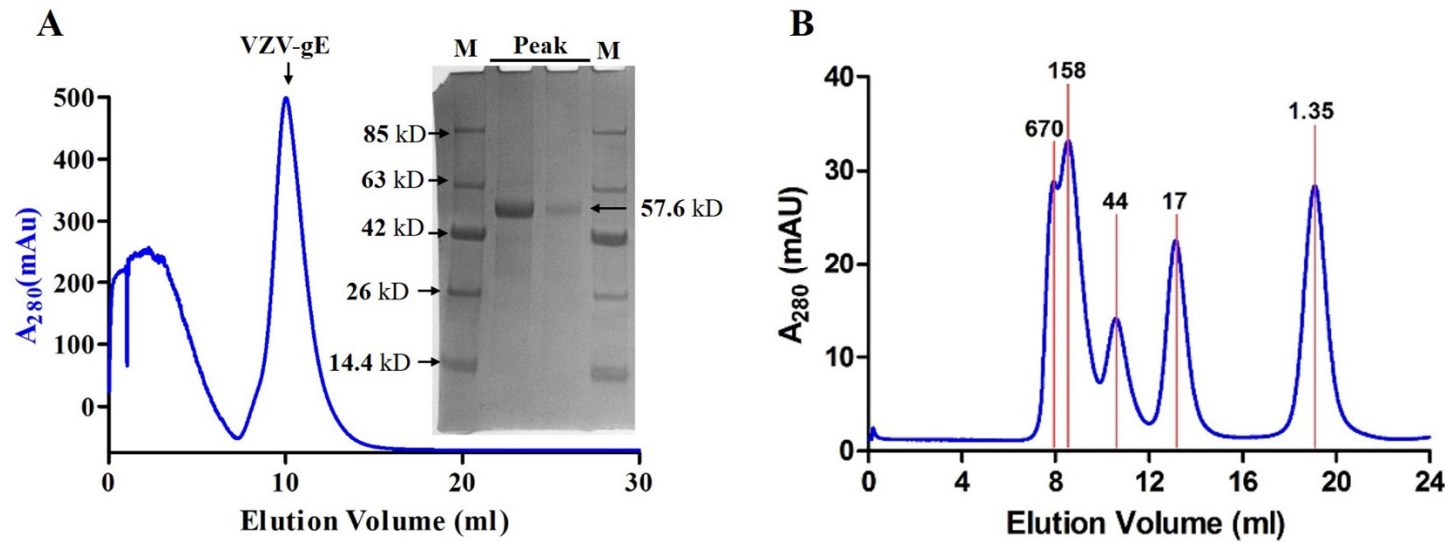

**Supplementary Figure S3.** Purification of VZV-gE recombinant protein using baculovirus vector expression system (BVES). **A.** The recombinant protein was obtained from supernatant of Hi5 cell line culture, and purified. The pure protein was characterized through 10% SDS-PAGE based molecular weight (kDa) separation and determined using protein market (M). After staining with Coomassie blue dye, the gel was carefully washed and the purified band (57 kDa) was visualized on fluorescent light. **B.** A standard elution curve obtained from known molecular weight protein using the same size-exclusion chromatography (SEC) device was used to characterize the monomeric state of the purified VZV-gE protein.

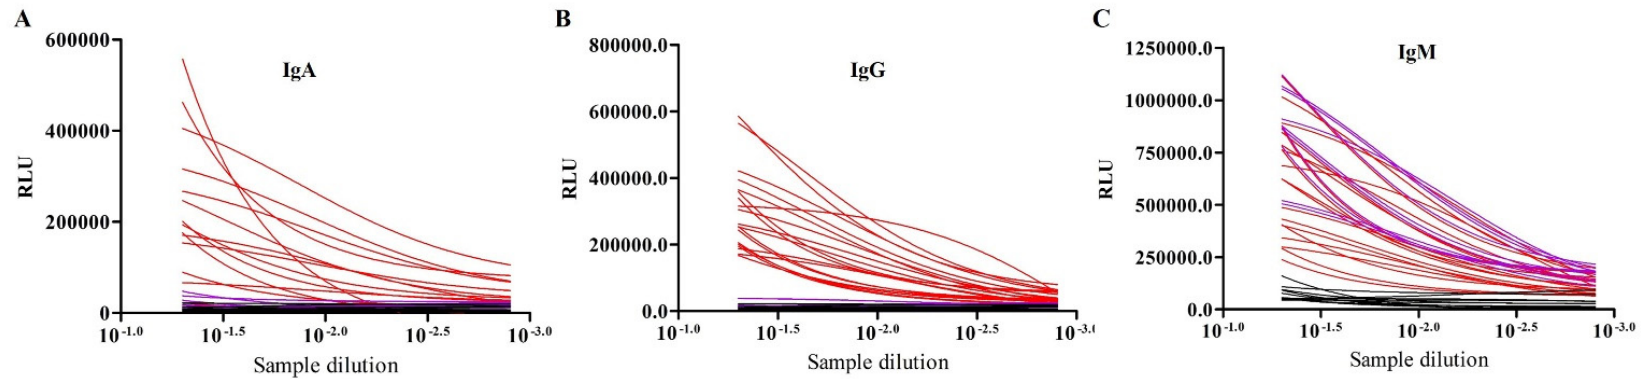

**Supplementary Figure S4.** Validation of VZV-gE specific IgA (A), IgG (B), and IgM (C) detection based on CLIA approach. 29 included patient samples were randomly selected and 2-fold serially diluted (from 1/20) to assess the ability of the purified gE protein to detect IgG and IgM antibodies using automated CLIA. The relative light unit (RLU) obtained for all the patients were transform and fit using GraphPad Prism 5. The negative controls are shown in black curves, the ELISA based equivocal are colored in pink-purple, and the positive are colored in red. RLU: relative light unit. This validated the diagnostic approach.
